# Supplementary material for: Comparing the inhibitory effects of CuO-rGO, CuO NPs, and CuCl2 on the oomycete Phytophthora sojae: insights from phenotypic and transcriptomic analyses
Source: Royal Society of Chemistry journal article supplement (doi:10.1039/d3en00363a), 2023-01-01
Supplement: d3en00363a1.pdf [file d3en00363a1.pdf]

**Comparing the inhibitory effects of CuO-rGO, CuO NPs, and CuCl<sub>2</sub>  
on the oomycete *Phytophthora sojae*: Insights from phenotypic and  
transcriptomic analyses**

Tao Li <sup>a</sup>, Yuhua Li <sup>a</sup>, Peiyan Qin <sup>a</sup>, Gehong Wei <sup>\*a</sup>, and Chun Chen <sup>\*a</sup>

*<sup>a</sup> State Key Laboratory of Crop Stress Biology for Arid Areas, Shaanxi Key Laboratory  
of Agricultural and Environmental Microbiology, College of Life Sciences, Northwest  
A&F University, Yangling 712100, Shaanxi, P R China*

\*Corresponding author

*E-mail address: [chunchen@nwsuaf.edu.cn](mailto:chunchen@nwsuaf.edu.cn); [weigehong@nwsuaf.edu.cn](mailto:weigehong@nwsuaf.edu.cn)*

## **Mycelial growth inhibition assay**

In our mycelium growth pre-experiment, we tested various concentrations of  $\text{Cu}^{2+}$  (0, 10, 25, 50, 100, 250, and 500  $\text{mg L}^{-1}$ ). We observed complete inhibition of *P. sojae* growth in colony size over 50  $\text{mg Cu}^{2+} \text{L}^{-1}$ , indicating a strong inhibitory impact of *P. sojae* growth. Meanwhile, we used 50  $\text{mg L}^{-1}$  single rGO as a positive control. We found single rGO had no significant inhibitory effect on *P. sojae*. This mean that the inhibitory effects on *P. sojae* are attribute to different forms copper and its released ions. So, we only compare the differences of CuO-rGO, CuO, and  $\text{CuCl}_2$  in this study, and selected the concentrations of 0, 10, 25, 50  $\text{mg Cu}^{2+} \text{L}^{-1}$ .

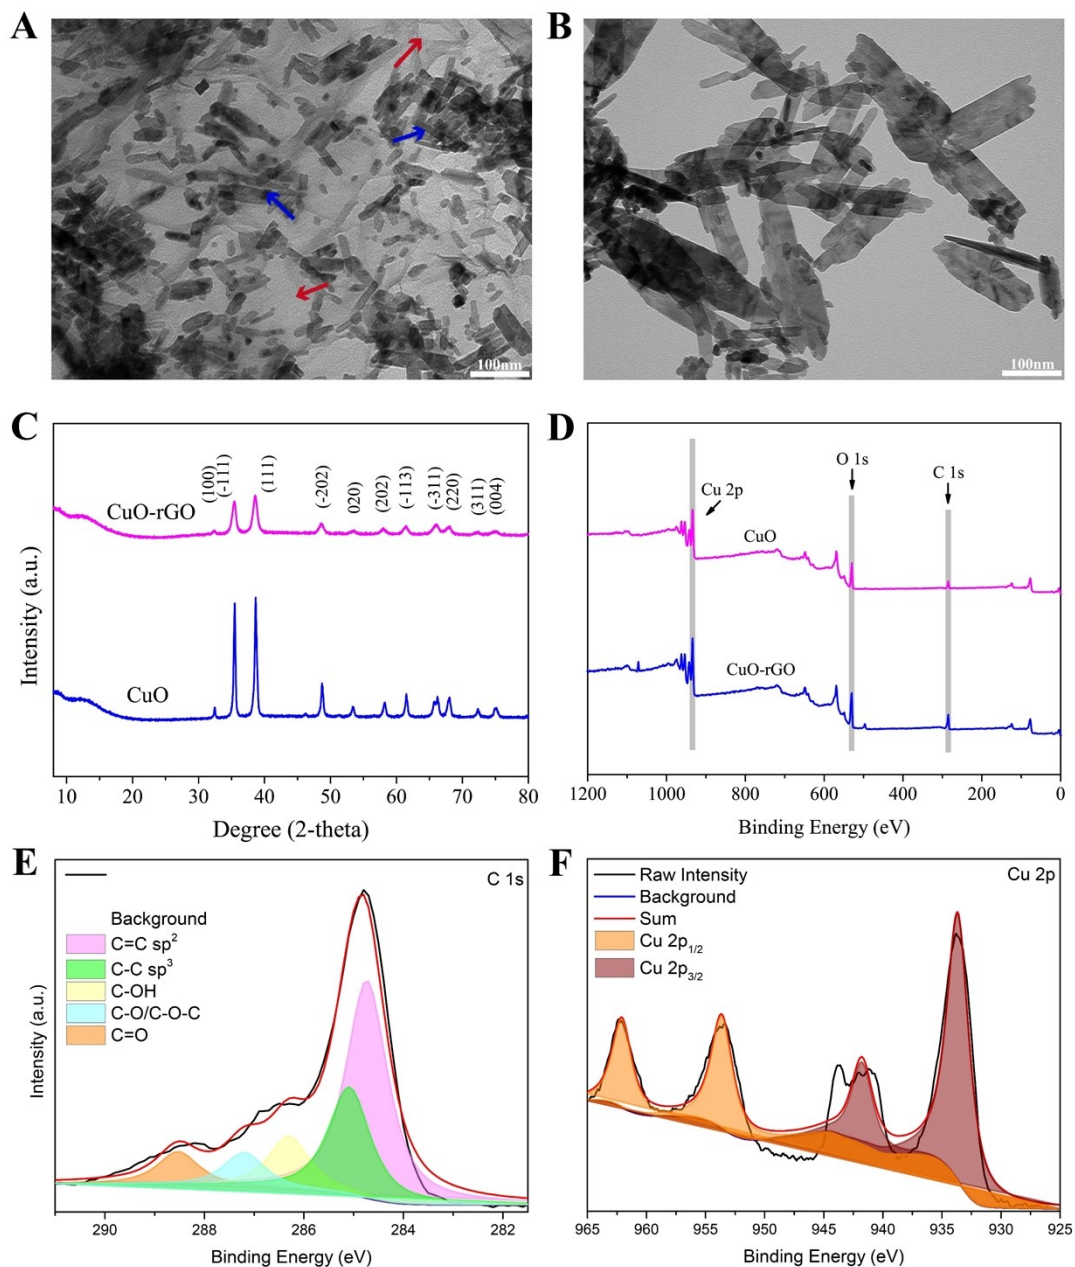

**Fig. S1** Transmission electron microscope (TEM) images of (A) CuO-rGO and (B) CuO NPs. The red and blue arrows indicate the rGO nanosheets and CuO NPs, respectively. X-ray diffractometer (XRD) patterns of CuO-rGO and CuO NPs (C). X-ray photoelectron spectroscopy (XPS) full spectrum of CuO-rGO and CuO NPs (D). The specific (E) C 1s and (F) Cu 2p spectrum of CuO-rGO.

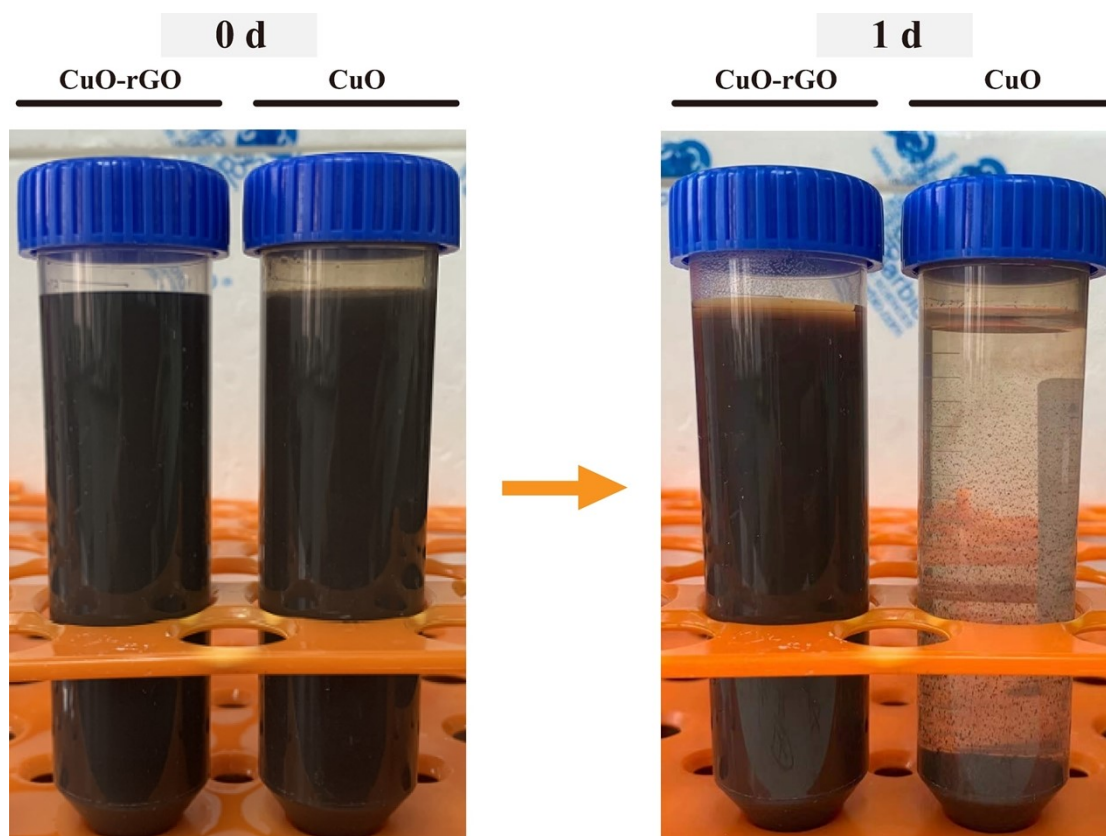

**Fig. S2** The dispersion of CuO-rGO and CuO NPs at the concentration of  $50 \text{ mg Cu}^{2+} \text{ L}^{-1}$  in water after ultrasonic dispersion and standing for 0 and 1 day.

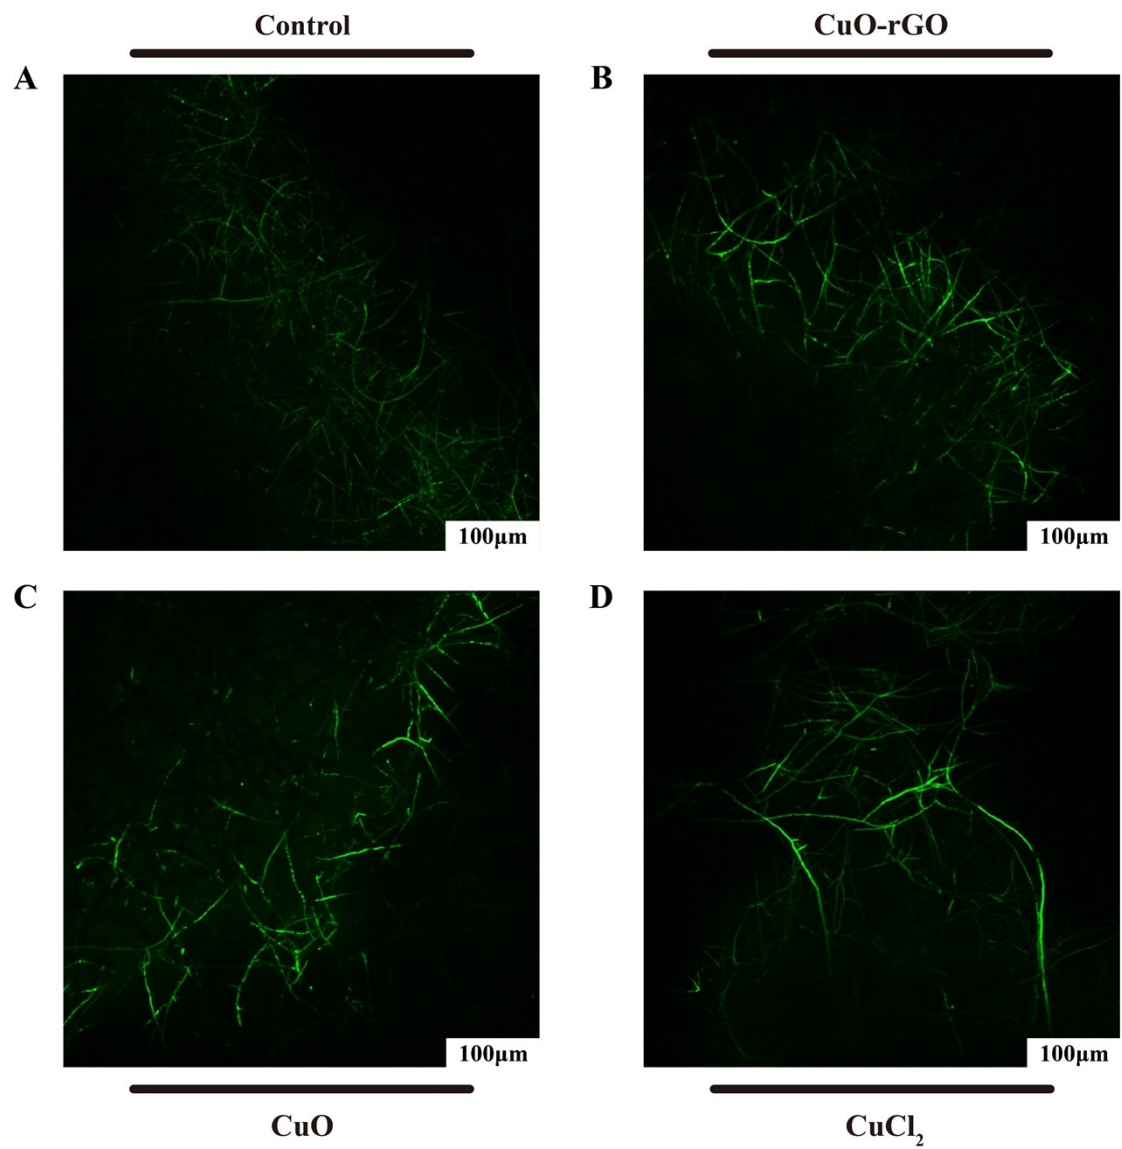

**Fig. S3** The mycelium ROS level of *P. sojae* in (A) Control, (B) CuO-rGO, (C) CuO NPs, and (D) CuCl<sub>2</sub> treatments at 10 mg Cu<sup>2+</sup> L<sup>-1</sup> level
